# Supplementary material for: Identification of coexistence of BRAF V600E mutation and EZH2 gain specifically in melanoma as a promising target for combination therapy
Source: PubMed Central journal article supplement (PMC5716227; doi:10.1186/s12967-017-1344-z), 2017-12-04
Supplement: 12967_2017_1344_MOESM4_ESM.pdf [file 12967_2017_1344_MOESM4_ESM.pdf]

# CompuSyn Report

**Experiment Name:** 2058 GSK126+vemurafenib  
**Date:** 2017/5/6  
**File Name:** C:\Users\»»\»»\Desktop\ BRAF andEZH2\2058lianhejieguo-report\2058lianhejieguo.cse  
**Description** conbinaton therapy

**Drug:** GSK126 (5) [uM/L]  
**Drug:** vemurafenib (5) [uM/L]  
**Drug Combo:** combination (4) (5+5 [1:1])

---

Data for Drug: 5 [uM/L]

**Dose Effect**

|      |       |
|------|-------|
| 4.0  | 0.378 |
| 6.0  | 0.791 |
| 8.0  | 0.941 |
| 10.0 | 0.975 |
| 11.0 | 0.984 |

5 data points entered.

**X-int:** 0.64877

**Y-int:** -2.9679 +/- 0.06428

**m:** 4.57460 +/- 0.07308

**Dm:** 4.45421

**r:** 0.99962

---

Data for Drug: 5 [uM/L]

**Dose Effect**

|     |       |
|-----|-------|
| 1.0 | 0.183 |
| 2.0 | 0.258 |
| 3.0 | 0.473 |
| 4.0 | 0.469 |
| 5.0 | 0.789 |

5 data points entered.

**X-int:** 0.49801

**Y-int:** -0.7717 +/- 0.19802

**m:** 1.54949 +/- 0.40949

**Dm:** 3.14782

**r:** 0.90927

---

Data for Drug Combo: 4 (5+5 [1:1])

**Dose A Effect**

|      |       |
|------|-------|
| 0.8+ | 0.259 |
| 1.0+ | 0.46  |
| 1.2+ | 0.6   |
| 1.6+ | 0.68  |
| 2.0+ | 0.82  |

5 data points entered.

**X-int:** 0.34963  
**Y-int:** -0.9095 +/- 0.12084  
**m:** 2.60144 +/- 0.28570  
**Dm:** 2.23682  
**r:** 0.98239

Dose-Effect Curve

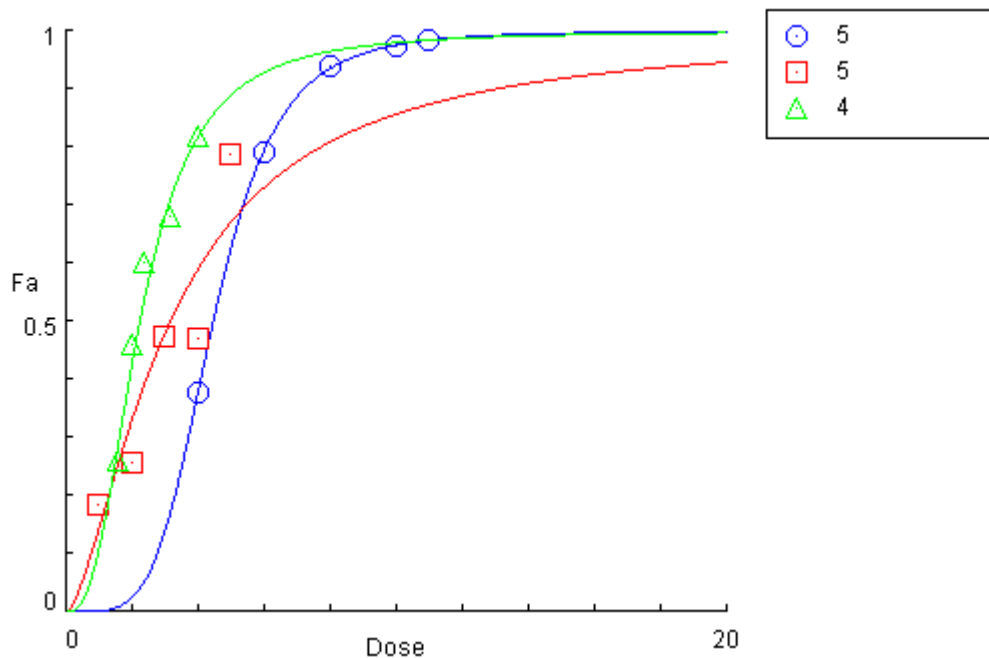

Median-Effect Plot

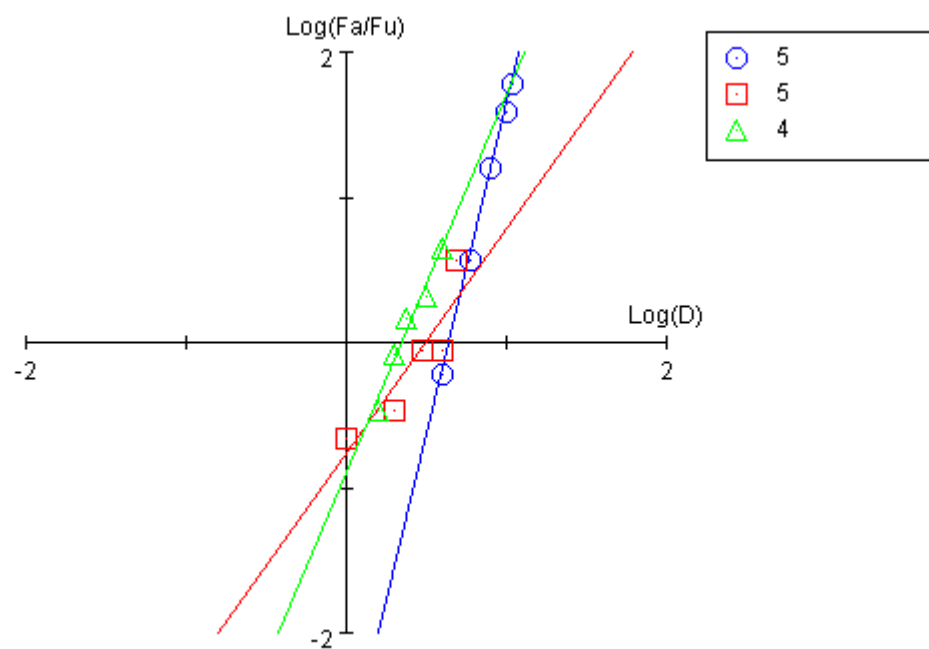

CI Data for Drug Combo: 4 (5+5 [1:1])

| Fa   | CI Value | Total Dose |
|------|----------|------------|
| 0.05 | 0.92025  | 0.72123    |
| 0.1  | 0.80484  | 0.96121    |
| 0.15 | 0.74705  | 1.14829    |

|      |         |         |
|------|---------|---------|
| 0.2  | 0.70970 | 1.31280 |
| 0.25 | 0.68255 | 1.46631 |
| 0.3  | 0.66141 | 1.61503 |
| 0.35 | 0.64419 | 1.76314 |
| 0.4  | 0.62972 | 1.91400 |
| 0.45 | 0.61727 | 2.07076 |
| 0.5  | 0.60639 | 2.23682 |
| 0.55 | 0.59675 | 2.41619 |
| 0.6  | 0.58817 | 2.61409 |
| 0.65 | 0.58053 | 2.83776 |
| 0.7  | 0.57378 | 3.09800 |
| 0.75 | 0.56799 | 3.41222 |
| 0.8  | 0.56342 | 3.81122 |
| 0.85 | 0.56070 | 4.35724 |
| 0.9  | 0.56169 | 5.20527 |
| 0.95 | 0.57389 | 6.93723 |
| 0.97 | 0.59024 | 8.51027 |

CI values for actual experimental points:

| Total Dose | Fa    | CI Value |
|------------|-------|----------|
| 1.6        | 0.259 | 0.72685  |
| 2.0        | 0.46  | 0.58483  |
| 2.4        | 0.6   | 0.54000  |
| 3.2        | 0.68  | 0.61713  |
| 4.0        | 0.82  | 0.56112  |

#### Combination Index Plot

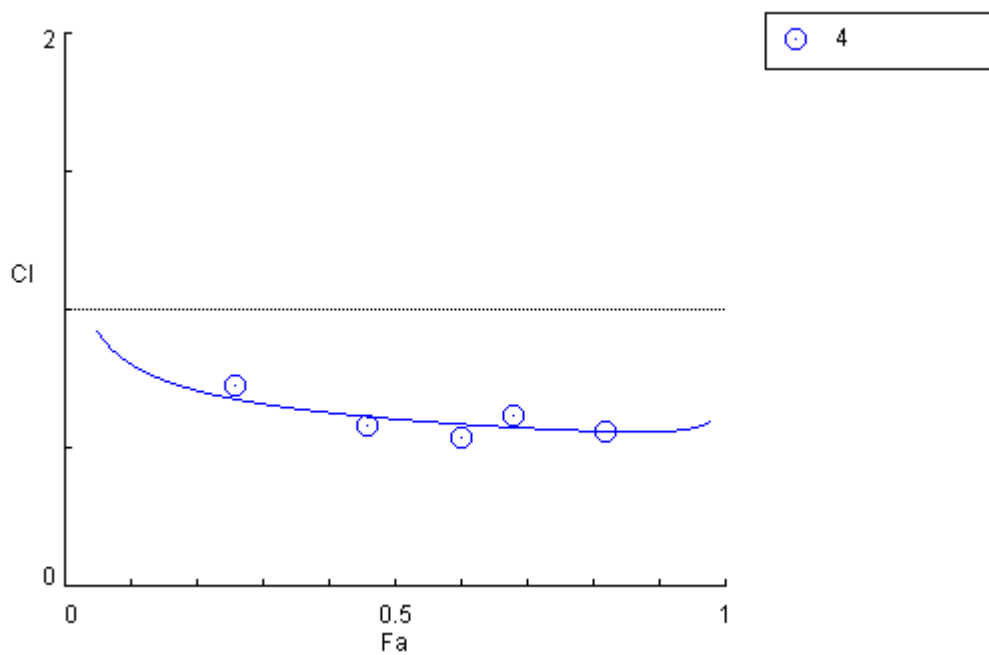

#### Logarithmic Combination Index Plot

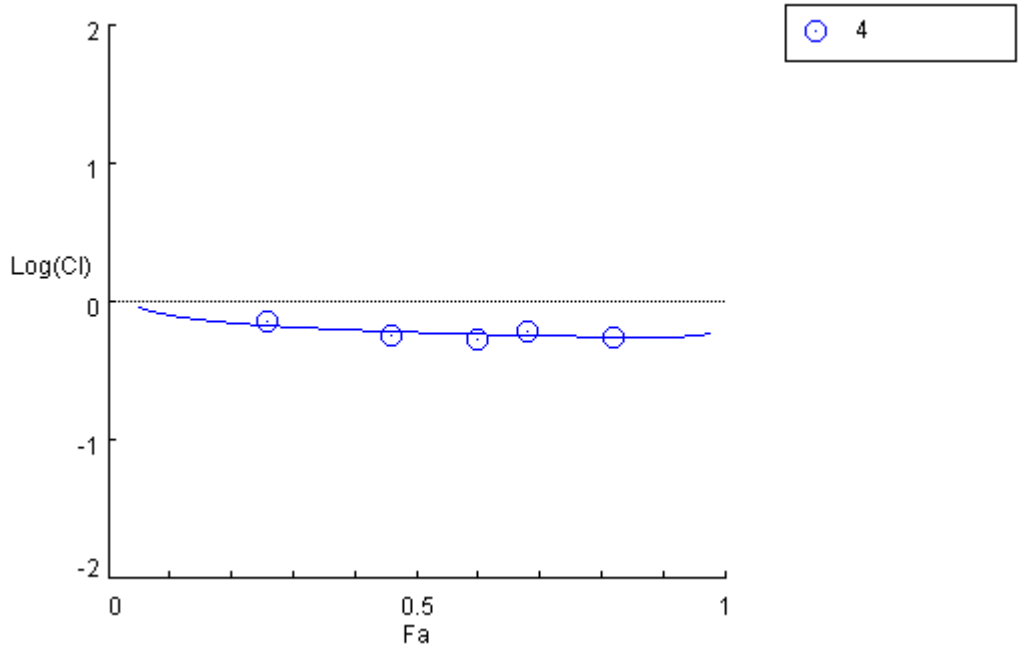

DRI Data for Drug Combo: 4 (5+5 [1:1])

| Fa   | Dose 5  | Dose 5  | DRI 5   | DRI 5   |
|------|---------|---------|---------|---------|
| 0.05 | 2.34011 | 0.47069 | 6.48920 | 1.30523 |
| 0.1  | 2.75534 | 0.76237 | 5.73306 | 1.58627 |
| 0.15 | 3.04856 | 1.02761 | 5.30975 | 1.78982 |
| 0.2  | 3.28974 | 1.28663 | 5.01180 | 1.96014 |
| 0.25 | 3.50326 | 1.54913 | 4.77835 | 2.11297 |
| 0.3  | 3.70111 | 1.82191 | 4.58334 | 2.25619 |
| 0.35 | 3.89047 | 2.11107 | 4.41312 | 2.39468 |
| 0.4  | 4.07641 | 2.42306 | 4.25958 | 2.53194 |
| 0.45 | 4.26304 | 2.76544 | 4.11737 | 2.67094 |
| 0.5  | 4.45421 | 3.14782 | 3.98263 | 2.81455 |
| 0.55 | 4.65395 | 3.58306 | 3.85230 | 2.96587 |
| 0.6  | 4.86703 | 4.08935 | 3.72369 | 3.12870 |
| 0.65 | 5.09964 | 4.69371 | 3.59414 | 3.30804 |
| 0.7  | 5.36056 | 5.43867 | 3.46065 | 3.51108 |
| 0.75 | 5.66329 | 6.39635 | 3.31942 | 3.74908 |
| 0.8  | 6.03087 | 7.70131 | 3.16480 | 4.04139 |
| 0.85 | 6.50799 | 9.64248 | 2.98721 | 4.42596 |
| 0.9  | 7.20057 | 12.9973 | 2.76664 | 4.99391 |
| 0.95 | 8.47821 | 21.0516 | 2.44427 | 6.06918 |
| 0.97 | 9.52309 | 29.6689 | 2.23802 | 6.97249 |

DRI values calculated at experimental points

| Fa    | Dose 5  | Dose 5  | DRI 5   | DRI 5   |
|-------|---------|---------|---------|---------|
| 0.259 | 3.53978 | 1.59729 | 4.42473 | 1.99661 |
| 0.46  | 4.30079 | 2.83837 | 4.30079 | 2.83837 |
| 0.6   | 4.86703 | 4.08935 | 4.05586 | 3.40779 |
| 0.68  | 5.25207 | 5.12011 | 3.28255 | 3.20007 |
| 0.82  | 6.20479 | 8.37560 | 3.10239 | 4.18780 |

DRI Plot for Combo: 4 (5+5 [1:1])

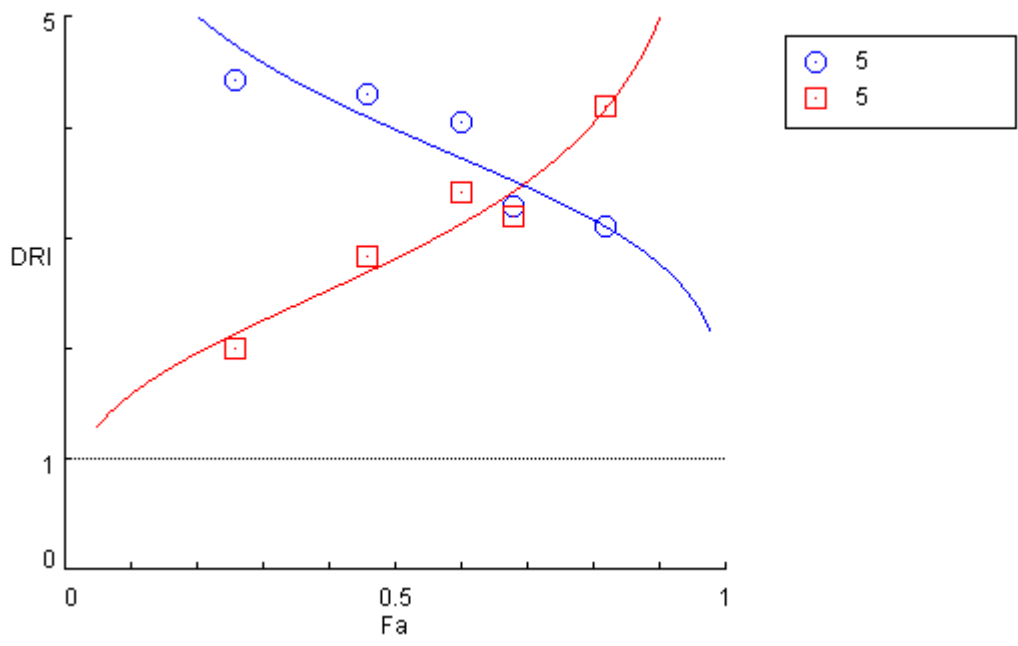

Log(DRI) Plot for Combo: 4 (5+5 [1:1])

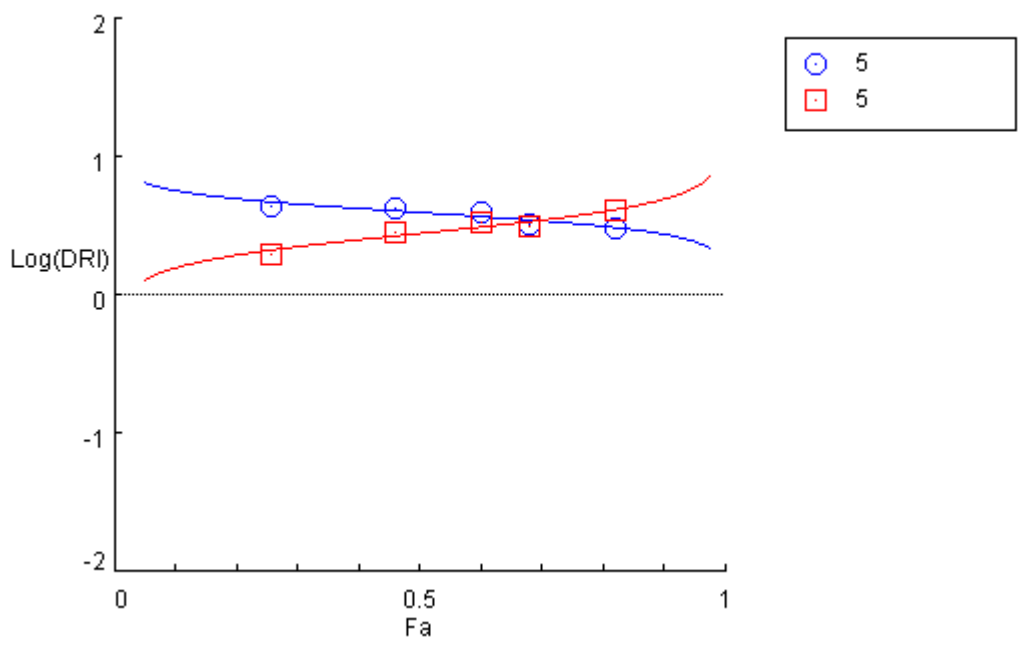

Isobologram for Combo: 4 (5+5 [1:1])

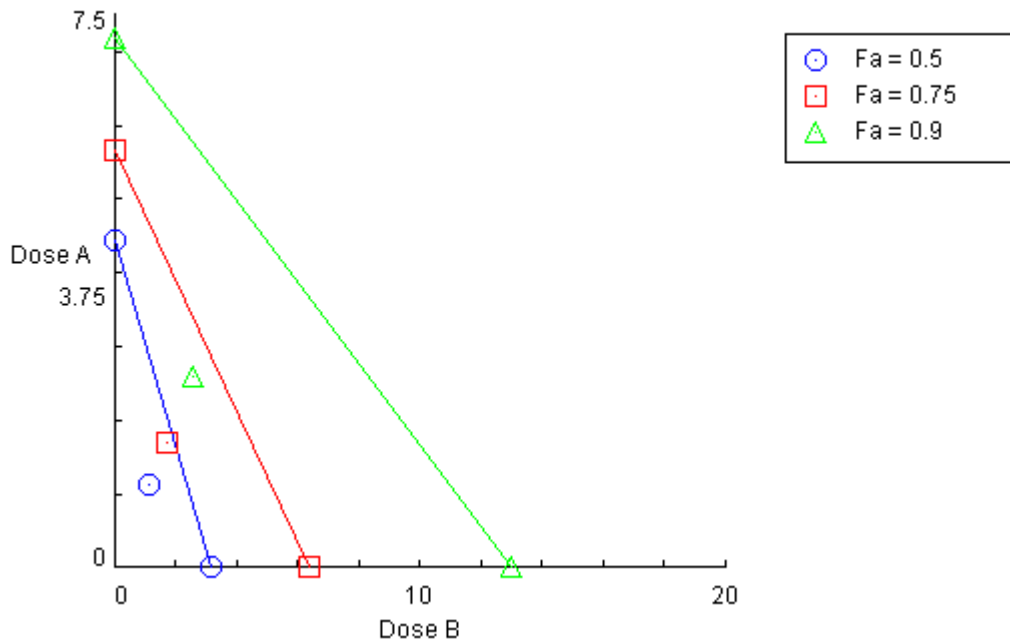

Polygonogram at Fa = 0.9

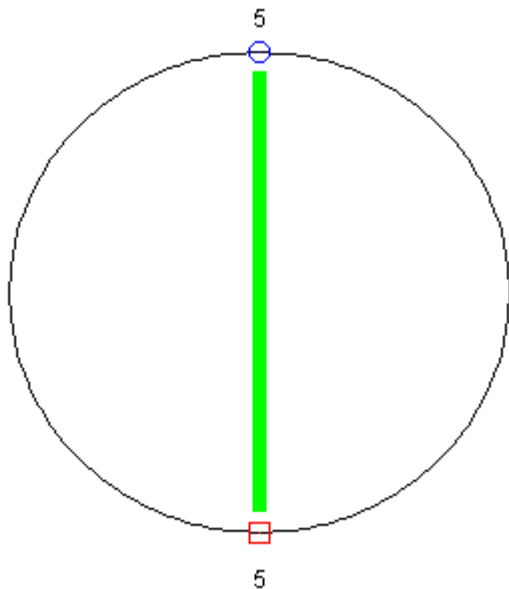

### Summary Table

**Experiment Name:** 2058 GSK126+vemurafenib  
**Date:** 2017/5/6  
**File Name:** C:\Users\>>\Desktop\BRAf andEZH2\2058lianhejieguo-report\2058lianhejieguo.cse  
**Description:** combinaton therapy

**Drug:** GSK126 (5) [uM/L]  
**Drug:** vemurafenib (5) [uM/L]  
**Drug Combo:** combination (4) (5+5 [1:1])

| Drug/Combo | Dm      | m       | r       |
|------------|---------|---------|---------|
| 5          | 4.45421 | 4.57460 | 0.99962 |
| 5          | 3.14782 | 1.54949 | 0.90927 |
| 4          | 2.23682 | 2.60144 | 0.98239 |

CI values at:

---

| <b>Combo</b> | <b>ED50</b> | <b>ED75</b> | <b>ED90</b> | <b>ED95</b> |
|--------------|-------------|-------------|-------------|-------------|
| 4            | 0.60639     | 0.56799     | 0.56169     | 0.57389     |

---

Data for Fa = 0.5

| <b>Drug/Combo</b> | <b>CI value</b> | <b>Dose 5</b> | <b>Dose 5</b> |
|-------------------|-----------------|---------------|---------------|
| 5                 |                 | 4.45421       |               |
| 5                 |                 |               | 3.14782       |
| 4                 | 0.60639         | 1.11841       | 1.11841       |

---

Data for Fa = 0.75

| <b>Drug/Combo</b> | <b>CI value</b> | <b>Dose 5</b> | <b>Dose 5</b> |
|-------------------|-----------------|---------------|---------------|
| 5                 |                 | 5.66329       |               |
| 5                 |                 |               | 6.39635       |
| 4                 | 0.56799         | 1.70611       | 1.70611       |

---

Data for Fa = 0.9

| <b>Drug/Combo</b> | <b>CI value</b> | <b>Dose 5</b> | <b>Dose 5</b> |
|-------------------|-----------------|---------------|---------------|
| 5                 |                 | 7.20057       |               |
| 5                 |                 |               | 12.9973       |
| 4                 | 0.56169         | 2.60264       | 2.60264       |

---

Data for Fa = 0.95

| <b>Drug/Combo</b> | <b>CI value</b> | <b>Dose 5</b> | <b>Dose 5</b> |
|-------------------|-----------------|---------------|---------------|
| 5                 |                 | 8.47821       |               |
| 5                 |                 |               | 21.0516       |
| 4                 | 0.57389         | 3.46861       | 3.46861       |

---

Data for Fa = 0.97

| <b>Drug/Combo</b> | <b>CI value</b> | <b>Dose 5</b> | <b>Dose 5</b> |
|-------------------|-----------------|---------------|---------------|
| 5                 |                 | 9.52309       |               |
| 5                 |                 |               | 29.6689       |
| 4                 | 0.59024         | 4.25513       | 4.25513       |

---
