# Supplementary material for: Identification of coexistence of BRAF V600E mutation and EZH2 gain specifically in melanoma as a promising target for combination therapy
Source: PubMed Central journal article supplement (PMC5716227; doi:10.1186/s12967-017-1344-z), 2017-12-04
Supplement: 12967_2017_1344_MOESM6_ESM.pdf [file 12967_2017_1344_MOESM6_ESM.pdf]

# CompuSyn Report

**Experiment Name:** 1675  
**Date:** 2017-5-6  
**File Name:** C:\Users\»»\»»\Desktop\BRAf andEZH2\1675lianhejieguo-report\1675ZUIHOU.cse  
**Description:** combination

**Drug:** GSK126 (6) [uM/L]  
**Drug:** vemurafenib (5) [uM/L]  
**Drug Combo:** combination (5) (6+5 [5:1])

---

Data for Drug: 6 [uM/L]

**Dose Effect**

|      |       |
|------|-------|
| 4.0  | 0.001 |
| 6.0  | 0.014 |
| 8.0  | 0.067 |
| 10.0 | 0.249 |
| 11.0 | 0.634 |
| 12.0 | 0.911 |

6 data points entered.

**X-int:** 1.01284

**Y-int:** -7.8565 +/- 0.80436

**m:** 7.75683 +/- 0.87826

**Dm:** 10.3002

**r:** 0.97531

---

Data for Drug: 5 [uM/L]

**Dose Effect**

|     |       |
|-----|-------|
| 0.6 | 0.222 |
| 0.8 | 0.355 |
| 1.0 | 0.561 |
| 1.2 | 0.579 |
| 1.6 | 0.612 |

5 data points entered.

**X-int:** 0.03233

**Y-int:** -0.0592 +/- 0.05816

**m:** 1.83225 +/- 0.39841

**Dm:** 1.07728

**r:** 0.93583

---

Data for Drug Combo: 5 (6+5 [5:1])

**Dose A Effect**

|       |       |
|-------|-------|
| 4.0+  | 0.222 |
| 6.0+  | 0.452 |
| 8.0+  | 0.501 |
| 10.0+ | 0.541 |
| 11.0+ | 0.597 |

5 data points entered.

**X-int:** 0.99564

**Y-int:** -1.4860 +/- 0.24147

**m:** 1.49253 +/- 0.25218

**Dm:** 9.90012

**r:** 0.95975

Dose-Effect Curve

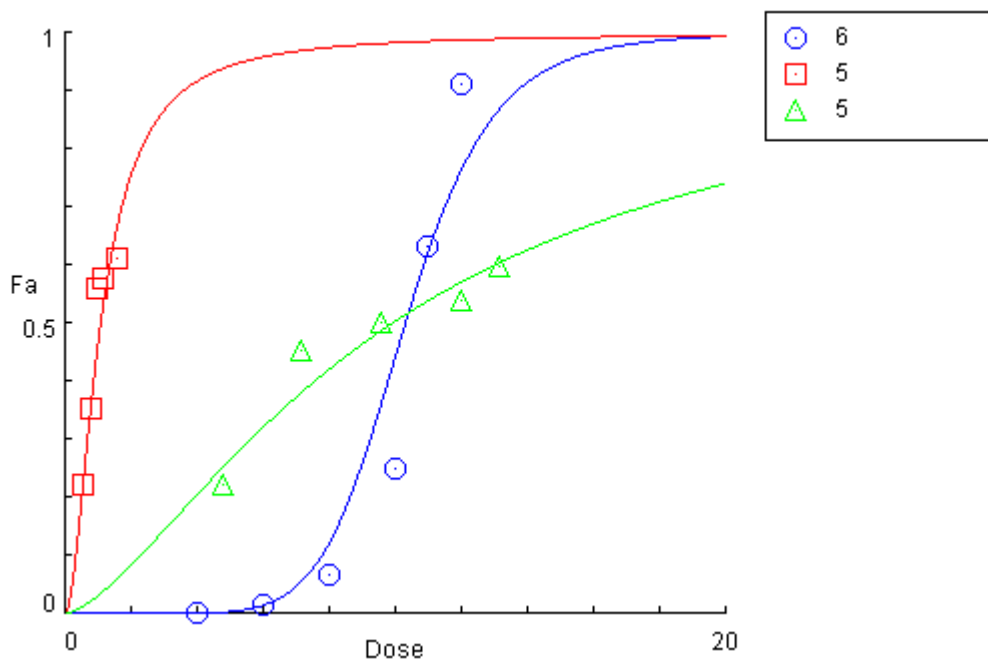

Median-Effect Plot

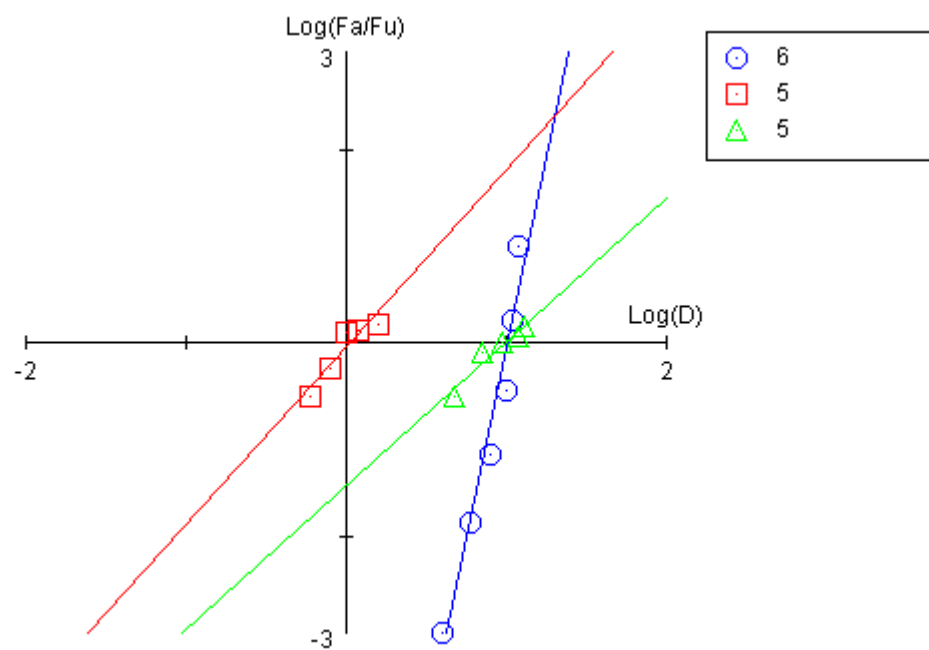

CI Data for Drug Combo: 5 (6+5 [5:1])

| Fa   | CI Value | Total Dose |
|------|----------|------------|
| 0.05 | 1.22525  | 1.37679    |
| 0.1  | 1.40972  | 2.27140    |

|      |         |         |
|------|---------|---------|
| 0.15 | 1.54806 | 3.09675 |
| 0.2  | 1.66765 | 3.91072 |
| 0.25 | 1.77828 | 4.74206 |
| 0.3  | 1.88504 | 5.61169 |
| 0.35 | 1.99127 | 6.53902 |
| 0.4  | 2.09959 | 7.54498 |
| 0.45 | 2.21249 | 8.65465 |
| 0.5  | 2.33262 | 9.90012 |
| 0.55 | 2.46315 | 11.3248 |
| 0.6  | 2.60824 | 12.9904 |
| 0.65 | 2.77374 | 14.9888 |
| 0.7  | 2.96851 | 17.4657 |
| 0.75 | 3.20700 | 20.6688 |
| 0.8  | 3.51534 | 25.0625 |
| 0.85 | 3.94750 | 31.6500 |
| 0.9  | 4.64228 | 43.1507 |
| 0.95 | 6.14843 | 71.1889 |
| 0.97 | 7.61259 | 101.652 |

CI values for actual experimental points:

| Total Dose | Fa    | CI Value |
|------------|-------|----------|
| 4.8        | 0.222 | 1.92882  |
| 7.2        | 0.452 | 1.83454  |
| 9.6        | 0.501 | 2.25827  |
| 12.0       | 0.541 | 2.64773  |
| 13.2       | 0.597 | 2.66315  |

### Combination Index Plot

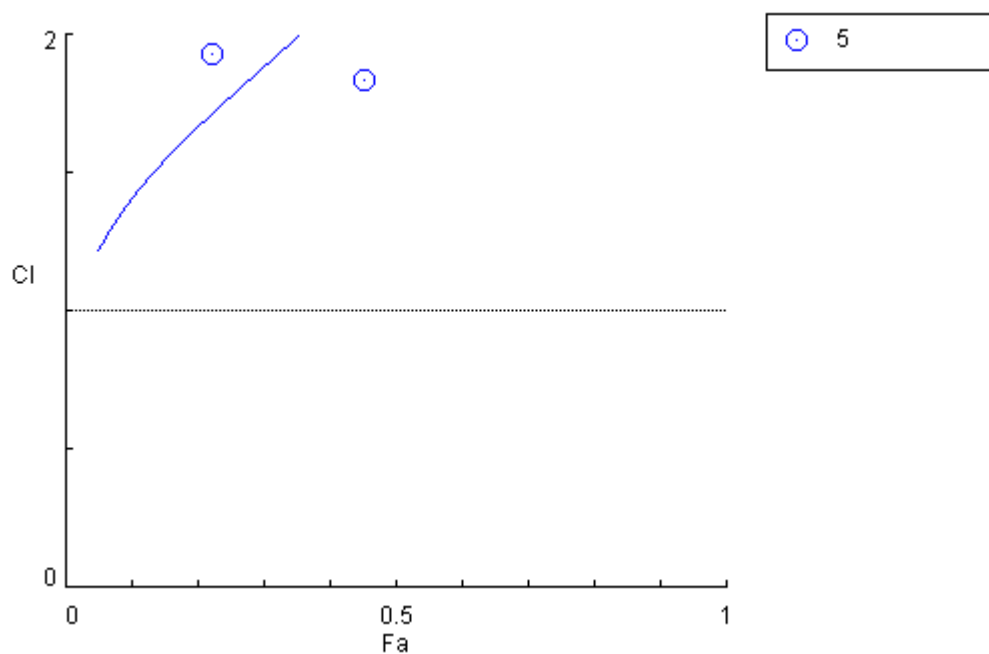

### Logarithmic Combination Index Plot

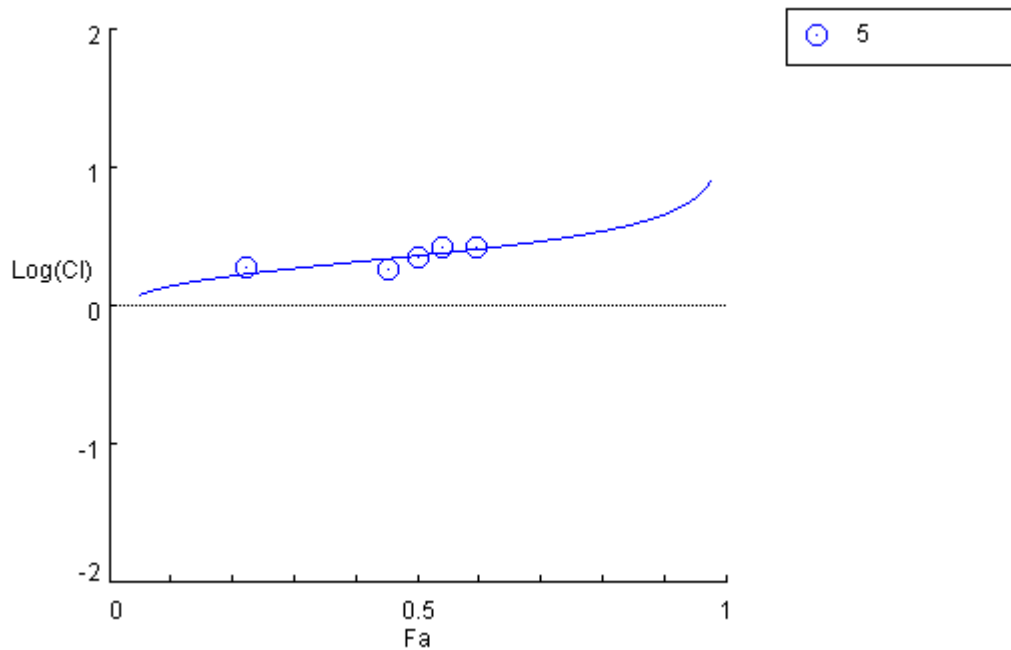

**DRI Data for Drug Combo: 5 (6+5 [5:1])**

| <b>Fa</b> | <b>Dose 6</b> | <b>Dose 5</b> | <b>DRI 6</b> | <b>DRI 5</b> |
|-----------|---------------|---------------|--------------|--------------|
| 0.05      | 7.04675       | 0.21598       | 6.14189      | 0.94124      |
| 0.1       | 7.75934       | 0.32473       | 4.09933      | 0.85780      |
| 0.15      | 8.23619       | 0.41800       | 3.19154      | 0.80989      |
| 0.2       | 8.61445       | 0.50552       | 2.64333      | 0.77559      |
| 0.25      | 8.93994       | 0.59146       | 2.26229      | 0.74836      |
| 0.3       | 9.23433       | 0.67842       | 1.97466      | 0.72536      |
| 0.35      | 9.51010       | 0.76842       | 1.74523      | 0.70508      |
| 0.4       | 9.77559       | 0.86342       | 1.55477      | 0.68662      |
| 0.45      | 10.0371       | 0.96553       | 1.39168      | 0.66937      |
| 0.5       | 10.3002       | 1.07728       | 1.24849      | 0.65289      |
| 0.55      | 10.5701       | 1.20197       | 1.12003      | 0.63682      |
| 0.6       | 10.8529       | 1.34411       | 1.00255      | 0.62082      |
| 0.65      | 11.1559       | 1.51028       | 0.89313      | 0.60456      |
| 0.7       | 11.4890       | 1.71065       | 0.78936      | 0.58766      |
| 0.75      | 11.8674       | 1.96214       | 0.68900      | 0.56960      |
| 0.8       | 12.3158       | 2.29572       | 0.58968      | 0.54960      |
| 0.85      | 12.8814       | 2.77637       | 0.48839      | 0.52633      |
| 0.9       | 13.6730       | 3.57381       | 0.38024      | 0.49693      |
| 0.95      | 15.0556       | 5.37331       | 0.25379      | 0.45288      |
| 0.97      | 16.1238       | 7.18224       | 0.19034      | 0.42393      |

**DRI values calculated at experimental points**

| <b>Fa</b> | <b>Dose 6</b> | <b>Dose 5</b> | <b>DRI 6</b> | <b>DRI 5</b> |
|-----------|---------------|---------------|--------------|--------------|
| 0.222     | 8.76258       | 0.54336       | 2.19064      | 0.67920      |
| 0.452     | 10.0476       | 0.96979       | 1.67460      | 0.80816      |
| 0.501     | 10.3055       | 1.07964       | 1.28818      | 0.67477      |
| 0.541     | 10.5208       | 1.17839       | 1.05208      | 0.58920      |
| 0.597     | 10.8354       | 1.33498       | 0.98504      | 0.60681      |

DRI Plot for Combo: 5 (6+5 [5:1])

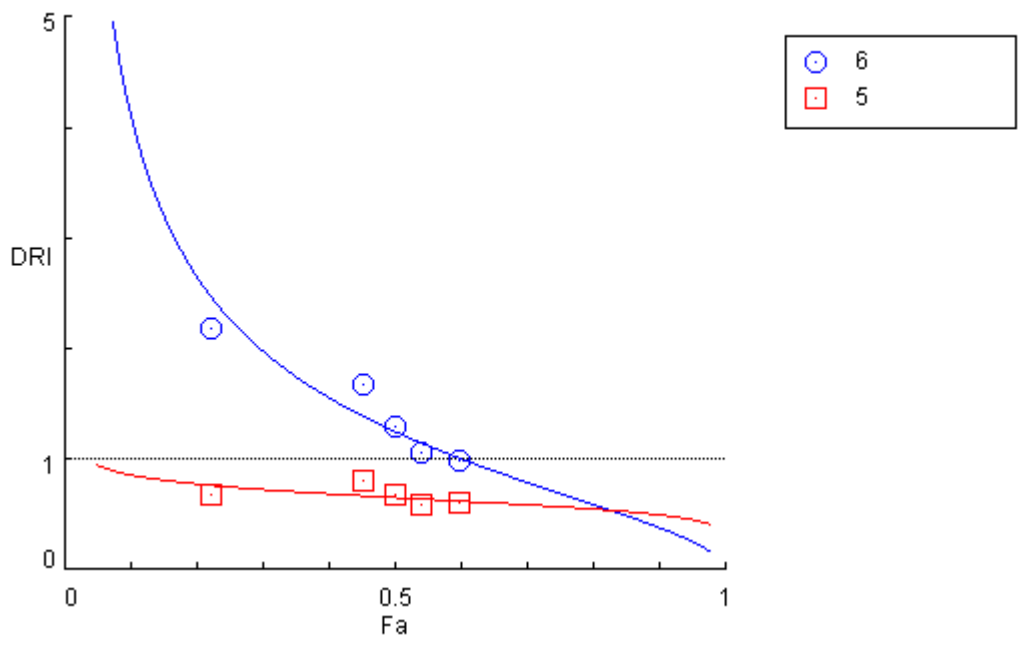

Log(DRI) Plot for Combo: 5 (6+5 [5:1])

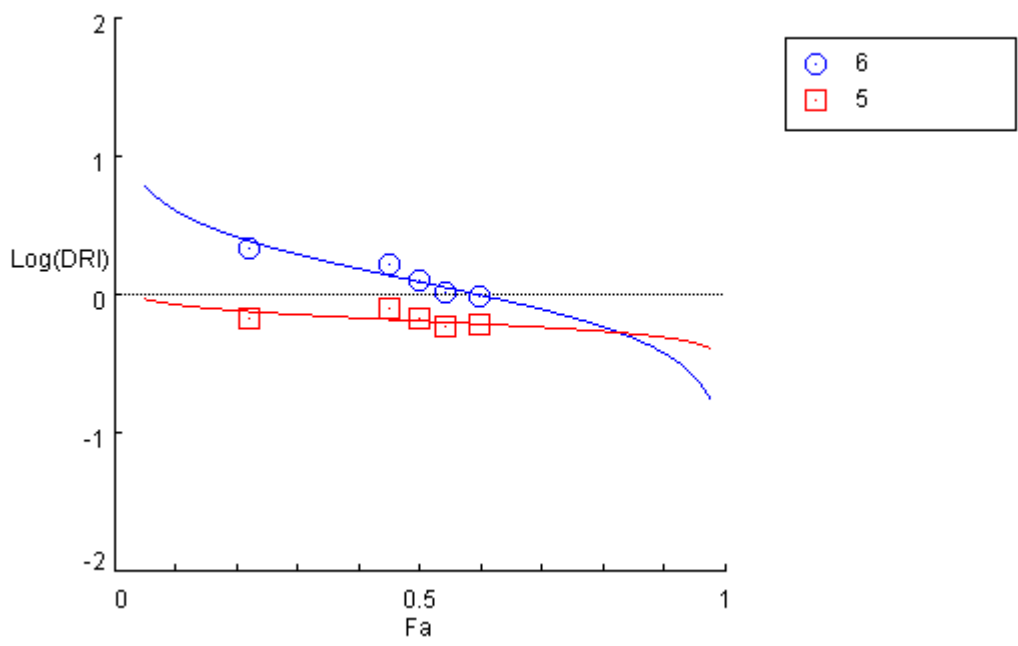

Isobologram for Combo: 5 (6+5 [5:1])

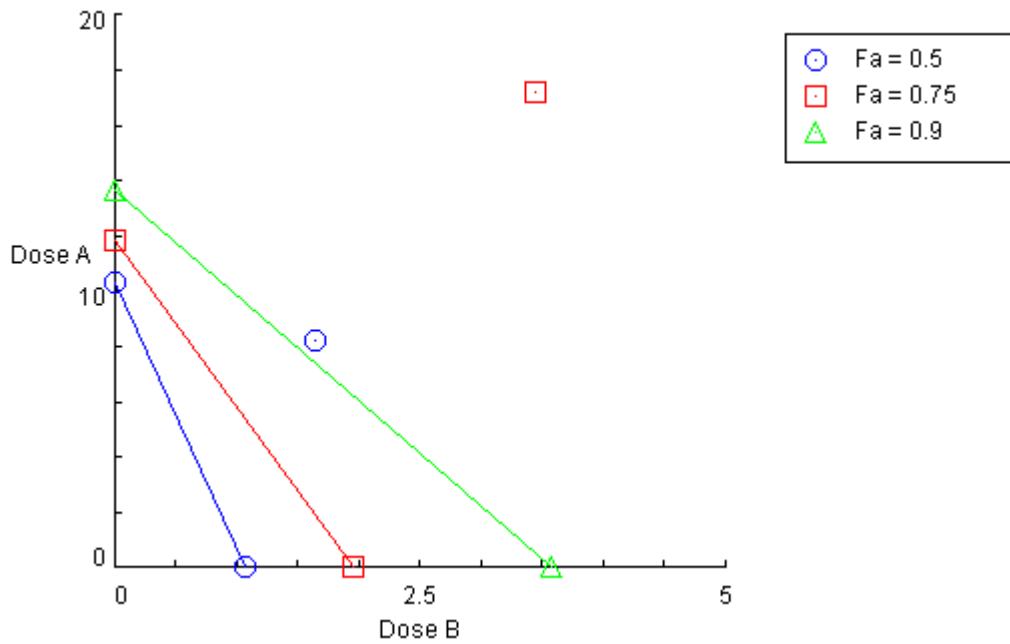

Polygonogram at Fa = 0.9

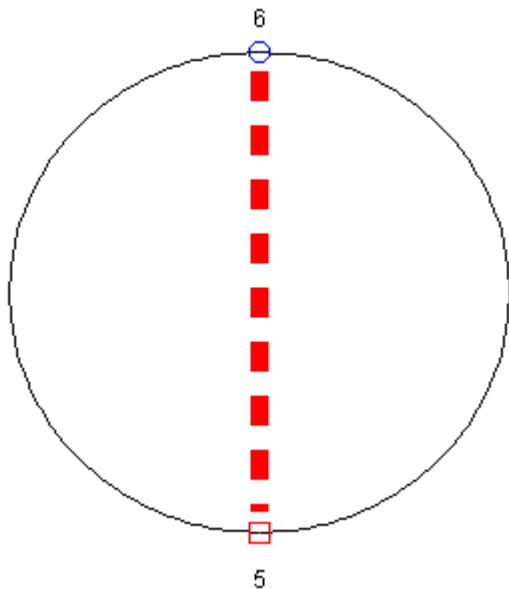

### Summary Table

**Experiment Name:** 1675  
**Date:** 2017-5-6  
**File Name:** C:\Users\»»\»»\Desktop\BRAAF andEZH2\1675lianhejieguo-report\1675ZUIHOU.cse  
**Description:** combination

**Drug:** GSK126 (6) [uM/L]  
**Drug:** vemurafenib (5) [uM/L]  
**Drug Combo:** combination (5) (6+5 [5:1])

| Drug/Combo | Dm      | m       | r       |
|------------|---------|---------|---------|
| 6          | 10.3002 | 7.75683 | 0.97531 |
| 5          | 1.07728 | 1.83225 | 0.93583 |
| 5          | 9.90012 | 1.49253 | 0.95975 |

CI values at:

---

| <b>Combo</b> | <b>ED50</b> | <b>ED75</b> | <b>ED90</b> | <b>ED95</b> |
|--------------|-------------|-------------|-------------|-------------|
| 5            | 2.33262     | 3.20700     | 4.64228     | 6.14843     |

---

Data for Fa = 0.5

| <b>Drug/Combo</b> | <b>CI value</b> | <b>Dose 6</b> | <b>Dose 5</b> |
|-------------------|-----------------|---------------|---------------|
| 6                 |                 | 10.3002       |               |
| 5                 |                 |               | 1.07728       |
| 5                 | 2.33262         | 8.25010       | 1.65002       |

---

Data for Fa = 0.75

| <b>Drug/Combo</b> | <b>CI value</b> | <b>Dose 6</b> | <b>Dose 5</b> |
|-------------------|-----------------|---------------|---------------|
| 6                 |                 | 11.8674       |               |
| 5                 |                 |               | 1.96214       |
| 5                 | 3.20700         | 17.2240       | 3.44479       |

---

Data for Fa = 0.9

| <b>Drug/Combo</b> | <b>CI value</b> | <b>Dose 6</b> | <b>Dose 5</b> |
|-------------------|-----------------|---------------|---------------|
| 6                 |                 | 13.6730       |               |
| 5                 |                 |               | 3.57381       |
| 5                 | 4.64228         | 35.9589       | 7.19179       |

---

Data for Fa = 0.95

| <b>Drug/Combo</b> | <b>CI value</b> | <b>Dose 6</b> | <b>Dose 5</b> |
|-------------------|-----------------|---------------|---------------|
| 6                 |                 | 15.0556       |               |
| 5                 |                 |               | 5.37331       |
| 5                 | 6.14843         | 59.3241       | 11.8648       |

---

Data for Fa = 0.97

| <b>Drug/Combo</b> | <b>CI value</b> | <b>Dose 6</b> | <b>Dose 5</b> |
|-------------------|-----------------|---------------|---------------|
| 6                 |                 | 16.1238       |               |
| 5                 |                 |               | 7.18224       |
| 5                 | 7.61259         | 84.7097       | 16.9419       |
