# Supplementary material for: Identification of coexistence of BRAF V600E mutation and EZH2 gain specifically in melanoma as a promising target for combination therapy
Source: PubMed Central journal article supplement (PMC5716227; doi:10.1186/s12967-017-1344-z), 2017-12-04
Supplement: 12967_2017_1344_MOESM7_ESM.pdf [file 12967_2017_1344_MOESM7_ESM.pdf]

# CompuSyn Report

**Experiment Name:** 375combination  
**Date:** 2017/9/13  
**File Name:** C:\Users\»¶\»¶\Desktop\375.cse  
**Description**

**Drug:** vemurafenib (6) [uM/L]  
**Drug:** GSK126 (6) [uM/L]  
**Drug Combo:** combination (5) (6+6 [1:12])

---

Data for Drug: 6 [uM/L]

**Dose Effect**

0.6 0.046

0.8 0.079

1.0 0.232

1.2 0.36

1.6 0.618

2.0 0.963

6 data points entered.

**X-int:** 0.09606

**Y-int:** -0.4726 +/- 0.12886

**m:** 4.91949 +/- 0.71085

**Dm:** 1.24755

**r:** 0.96069

---

Data for Drug: 6 [uM/L]

**Dose Effect**

2.0 0.055

4.0 0.0949

6.0 0.1682

8.0 0.2226

10.0 0.4087

12.0 0.7033

6 data points entered.

**X-int:** 1.06809

**Y-int:** -1.9815 +/- 0.32241

**m:** 1.85520 +/- 0.39297

**Dm:** 11.6975

**r:** 0.92078

---

Data for Drug Combo: 5 (6+6 [1:12])

**Dose A Effect**

0.4+ 0.3796

0.6+ 0.5361

0.8+ 0.6949

1.0+ 0.7718

1.2+ 0.8888

5 data points entered.

**X-int:** 0.83955

**Y-int:** -1.8734 +/- 0.25740

**m:** 2.23147 +/- 0.25722

**Dm:** 6.91122

**r:** 0.98065

Dose-Effect Curve

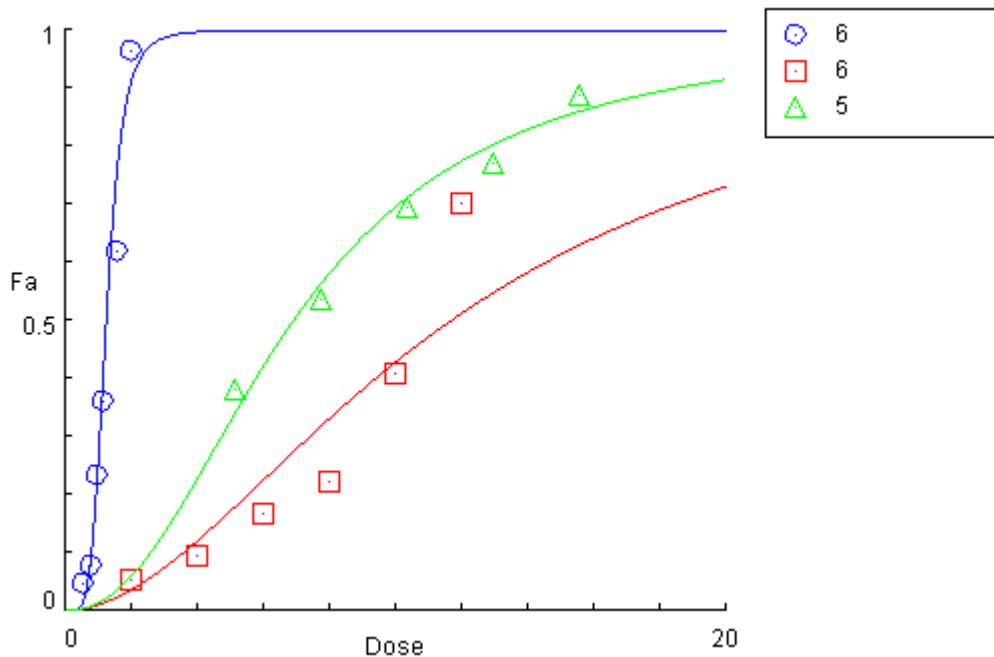

Median-Effect Plot

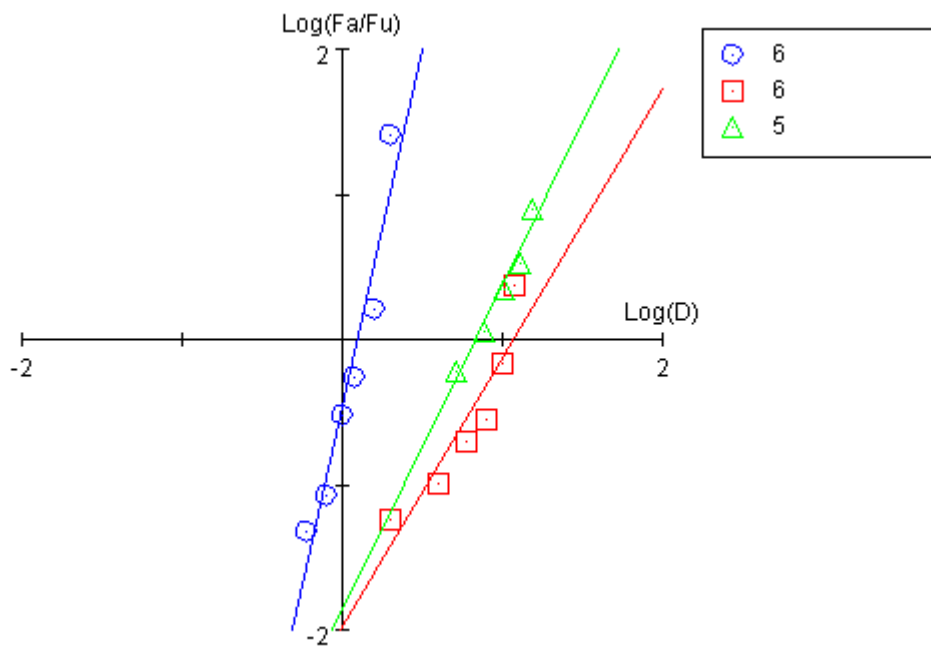

CI Data for Drug Combo: 5 (6+6 [1:12])

| Fa   | CI Value | Total Dose |
|------|----------|------------|
| 0.05 | 0.91995  | 1.84714    |

|      |         |         |
|------|---------|---------|
| 0.1  | 0.91476 | 2.58181 |
| 0.15 | 0.91719 | 3.17660 |
| 0.2  | 0.92210 | 3.71322 |
| 0.25 | 0.92828 | 4.22416 |
| 0.3  | 0.93534 | 4.72772 |
| 0.35 | 0.94315 | 5.23692 |
| 0.4  | 0.95172 | 5.76291 |
| 0.45 | 0.96113 | 6.31684 |
| 0.5  | 0.97153 | 6.91122 |
| 0.55 | 0.98313 | 7.56154 |
| 0.6  | 0.99627 | 8.28834 |
| 0.65 | 1.01143 | 9.12082 |
| 0.7  | 1.02935 | 10.1032 |
| 0.75 | 1.05123 | 11.3076 |
| 0.8  | 1.07920 | 12.8635 |
| 0.85 | 1.11749 | 15.0365 |
| 0.9  | 1.17647 | 18.5006 |
| 0.95 | 1.29367 | 25.8589 |
| 0.97 | 1.39583 | 32.8158 |

CI values for actual experimental points:

| Total Dose | Fa     | CI Value |
|------------|--------|----------|
| 5.2        | 0.3796 | 0.88905  |
| 7.8        | 0.5361 | 1.03636  |
| 10.4       | 0.6949 | 1.06907  |
| 13.0       | 0.7718 | 1.15763  |
| 15.6       | 0.8888 | 1.03193  |

### Combination Index Plot

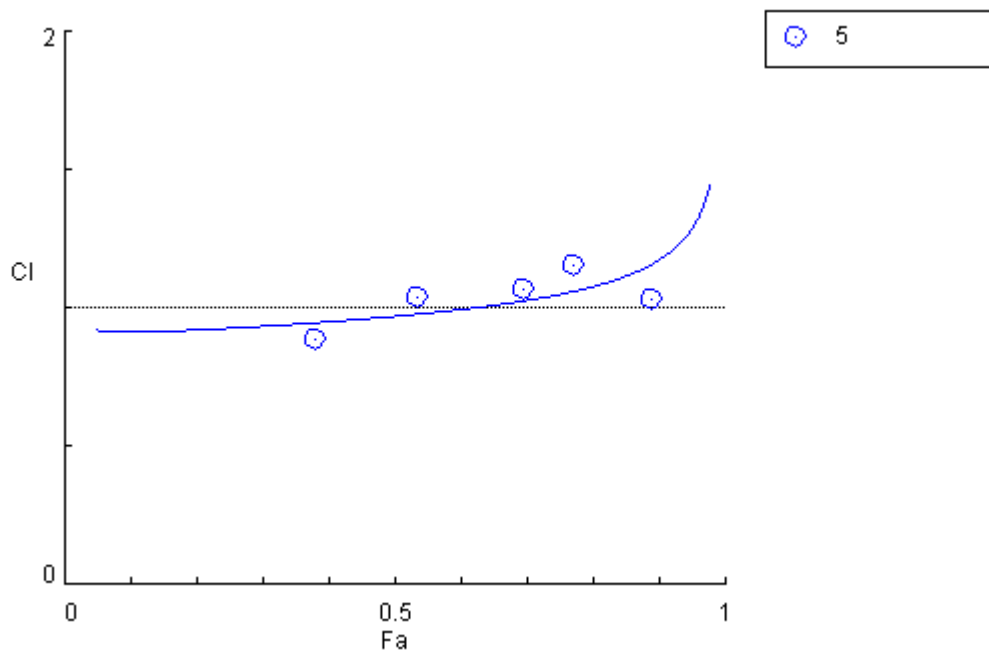

### Logarithmic Combination Index Plot

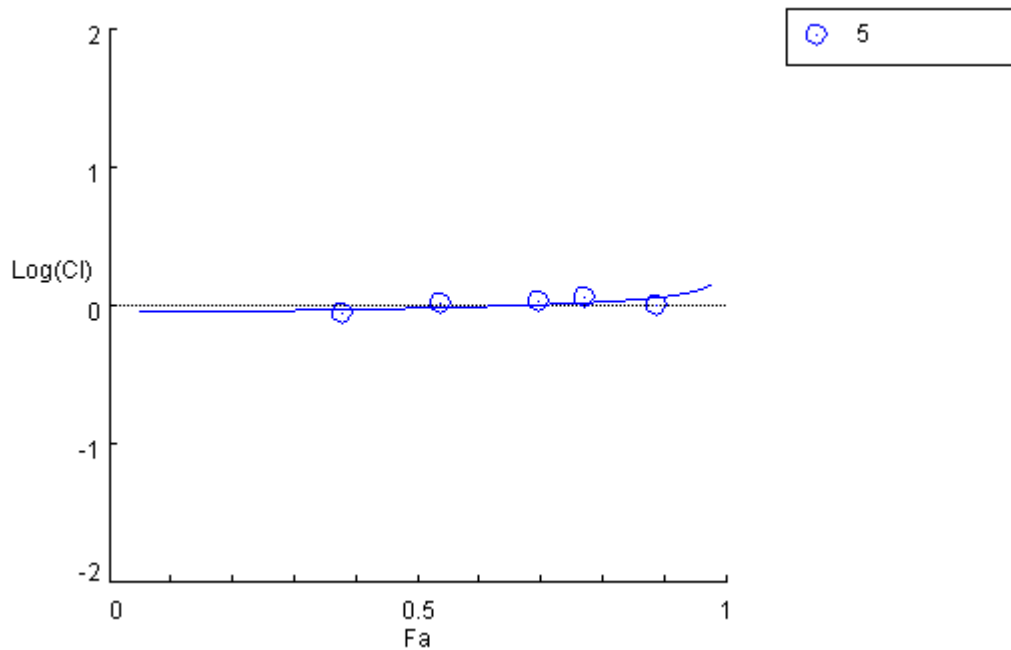

#### DRI Data for Drug Combo: 5 (6+6 [1:12])

| Fa   | Dose 6  | Dose 6  | DRI 6   | DRI 6   |
|------|---------|---------|---------|---------|
| 0.05 | 0.68568 | 2.39227 | 4.82574 | 1.40305 |
| 0.1  | 0.79815 | 3.57874 | 4.01887 | 1.50165 |
| 0.15 | 0.87685 | 4.59228 | 3.58845 | 1.56613 |
| 0.2  | 0.94118 | 5.54072 | 3.29509 | 1.61651 |
| 0.25 | 0.99786 | 6.47010 | 3.07096 | 1.65933 |
| 0.3  | 1.05016 | 7.40871 | 2.88768 | 1.69767 |
| 0.35 | 1.10004 | 8.37871 | 2.73071 | 1.73326 |
| 0.4  | 1.14885 | 9.40099 | 2.59157 | 1.76723 |
| 0.45 | 1.19768 | 10.4982 | 2.46482 | 1.80043 |
| 0.5  | 1.24755 | 11.6975 | 2.34663 | 1.83357 |
| 0.55 | 1.29949 | 13.0337 | 2.23411 | 1.86732 |
| 0.6  | 1.35473 | 14.5549 | 2.12484 | 1.90241 |
| 0.65 | 1.41484 | 16.3307 | 2.01658 | 1.93970 |
| 0.7  | 1.48203 | 18.4689 | 1.90696 | 1.98036 |
| 0.75 | 1.55971 | 21.1481 | 1.79315 | 2.02611 |
| 0.8  | 1.65363 | 24.6954 | 1.67118 | 2.07979 |
| 0.85 | 1.77496 | 29.7957 | 1.53456 | 2.14668 |
| 0.9  | 1.94997 | 38.2342 | 1.37021 | 2.23887 |
| 0.95 | 2.26983 | 57.1968 | 1.14111 | 2.39620 |
| 0.97 | 2.52888 | 76.1782 | 1.00182 | 2.51484 |

#### DRI values calculated at experimental points

| Fa     | Dose 6  | Dose 6  | DRI 6   | DRI 6   |
|--------|---------|---------|---------|---------|
| 0.3796 | 1.12899 | 8.97620 | 2.82247 | 1.87004 |
| 0.5361 | 1.28477 | 12.6460 | 2.14129 | 1.75639 |
| 0.6949 | 1.47477 | 18.2298 | 1.84346 | 1.89894 |
| 0.7718 | 1.59818 | 22.5599 | 1.59818 | 1.87999 |
| 0.8888 | 1.90349 | 35.8648 | 1.58624 | 2.49061 |

DRI Plot for Combo: 5 (6+6 [1:12])

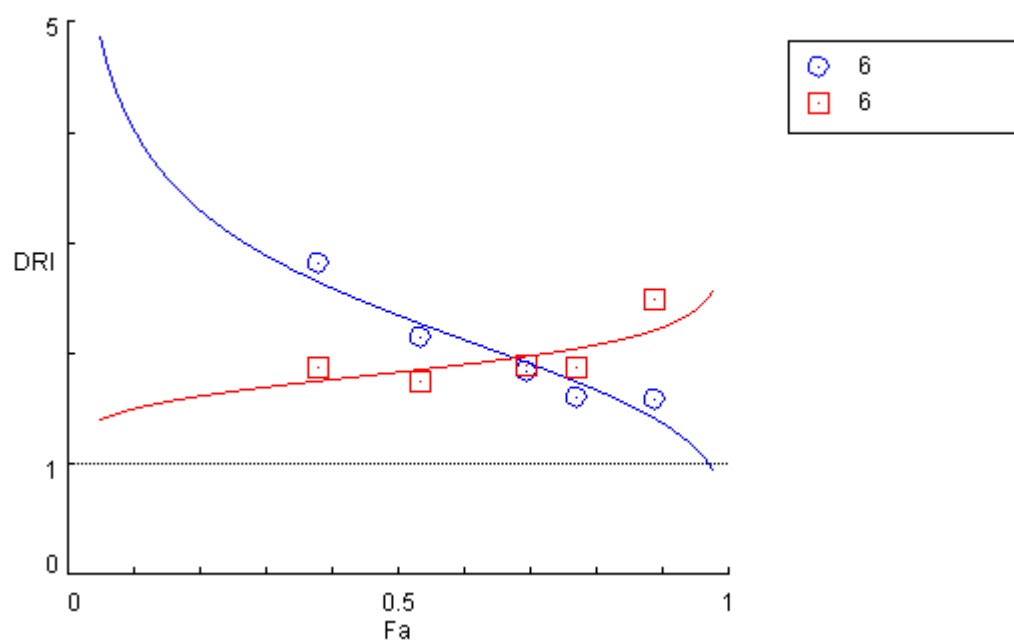

Log(DRI) Plot for Combo: 5 (6+6 [1:12])

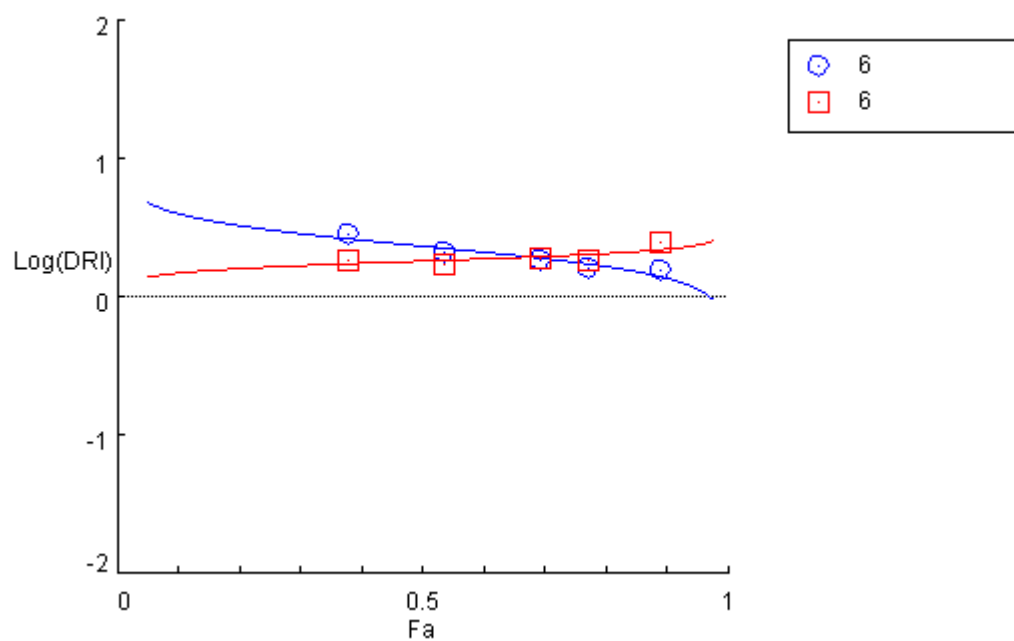

Isobologram for Combo: 5 (6+6 [1:12])

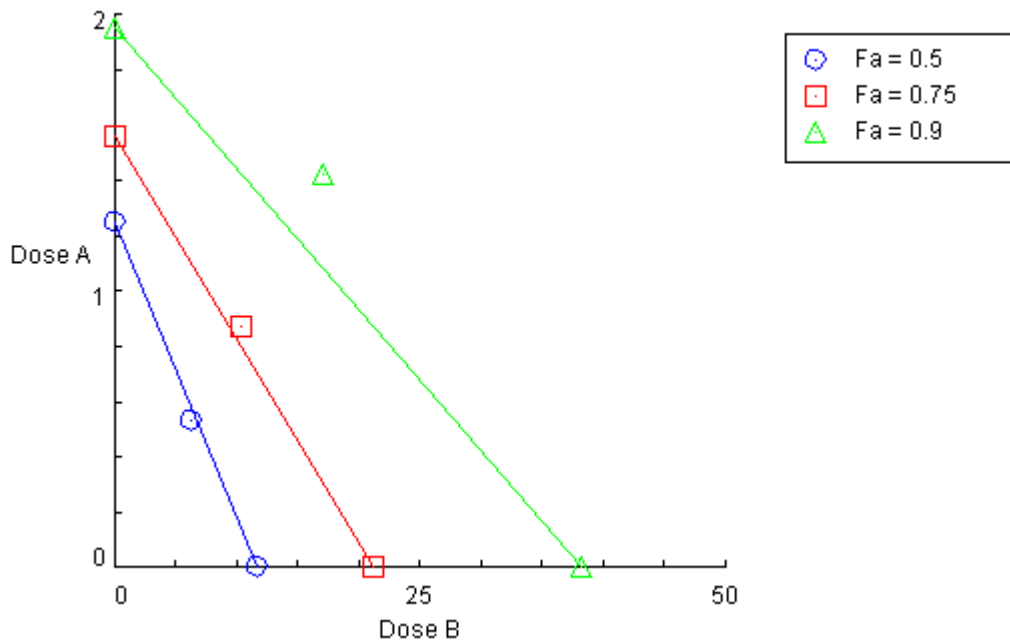

Polygonogram at Fa = 0.9

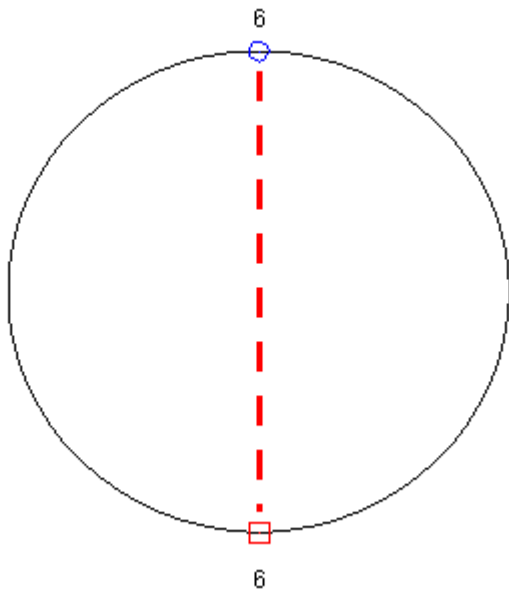

### Summary Table

**Experiment Name:** 375combination  
**Date:** 2017/9/13  
**File Name:** C:\Users\>>¶\Desktop\375.cse  
**Description**

**Drug:** vemurafenib (6) [uM/L]  
**Drug:** GSK126 (6) [uM/L]  
**Drug Combo:** combination (5) (6+6 [1:12])

| Drug/Combo | Dm      | m       | r       |
|------------|---------|---------|---------|
| 6          | 1.24755 | 4.91949 | 0.96069 |
| 6          | 11.6975 | 1.85520 | 0.92078 |
| 5          | 6.91122 | 2.23147 | 0.98065 |

CI values at:

---

| <b>Combo</b> | <b>ED50</b> | <b>ED75</b> | <b>ED90</b> | <b>ED95</b> |
|--------------|-------------|-------------|-------------|-------------|
| 5            | 0.97153     | 1.05123     | 1.17647     | 1.29367     |

---

Data for Fa = 0.5

| <b>Drug/Combo</b> | <b>CI value</b> | <b>Dose 6</b> | <b>Dose 6</b> |
|-------------------|-----------------|---------------|---------------|
| 6                 |                 | 1.24755       |               |
| 6                 |                 |               | 11.6975       |
| 5                 | 0.97153         | 0.53163       | 6.37959       |

---

Data for Fa = 0.75

| <b>Drug/Combo</b> | <b>CI value</b> | <b>Dose 6</b> | <b>Dose 6</b> |
|-------------------|-----------------|---------------|---------------|
| 6                 |                 | 1.55971       |               |
| 6                 |                 |               | 21.1481       |
| 5                 | 1.05123         | 0.86981       | 10.4378       |

---

Data for Fa = 0.9

| <b>Drug/Combo</b> | <b>CI value</b> | <b>Dose 6</b> | <b>Dose 6</b> |
|-------------------|-----------------|---------------|---------------|
| 6                 |                 | 1.94997       |               |
| 6                 |                 |               | 38.2342       |
| 5                 | 1.17647         | 1.42312       | 17.0774       |

---

Data for Fa = 0.95

| <b>Drug/Combo</b> | <b>CI value</b> | <b>Dose 6</b> | <b>Dose 6</b> |
|-------------------|-----------------|---------------|---------------|
| 6                 |                 | 2.26983       |               |
| 6                 |                 |               | 57.1968       |
| 5                 | 1.29367         | 1.98915       | 23.8697       |

---

Data for Fa = 0.97

| <b>Drug/Combo</b> | <b>CI value</b> | <b>Dose 6</b> | <b>Dose 6</b> |
|-------------------|-----------------|---------------|---------------|
| 6                 |                 | 2.52888       |               |
| 6                 |                 |               | 76.1782       |
| 5                 | 1.39583         | 2.52429       | 30.2915       |
