# Supplementary material for: Identification of coexistence of BRAF V600E mutation and EZH2 gain specifically in melanoma as a promising target for combination therapy
Source: PubMed Central journal article supplement (PMC5716227; doi:10.1186/s12967-017-1344-z), 2017-12-04
Supplement: 12967_2017_1344_MOESM8_ESM.pdf [file 12967_2017_1344_MOESM8_ESM.pdf]

# CompuSyn Report

**Experiment Name:** SK5-LIANHE  
**Date:** 2017/9/13  
**File Name:** C:\Users\»»»\Desktop\SK-5.cse  
**Description:** COMBINATION

**Drug:** vemurafenib (6) [uM/L]  
**Drug:** GSK126 (6) [uM/L]  
**Drug Combo:** combination (6) (6+6 [1:7])

---

Data for Drug: 6 [uM/L]

**Dose Effect**

|     |       |
|-----|-------|
| 0.6 | 0.068 |
| 0.8 | 0.18  |
| 1.0 | 0.189 |
| 1.2 | 0.232 |
| 1.6 | 0.446 |
| 2.0 | 0.653 |

6 data points entered.

**X-int:** 0.22985

**Y-int:** -0.5713 +/- 0.05119

**m:** 2.48537 +/- 0.28240

**Dm:** 1.69764

**r:** 0.97514

---

Data for Drug: 6 [uM/L]

**Dose Effect**

|      |       |
|------|-------|
| 2.0  | 0.09  |
| 4.0  | 0.338 |
| 6.0  | 0.416 |
| 8.0  | 0.585 |
| 10.0 | 0.741 |
| 12.0 | 0.882 |

6 data points entered.

**X-int:** 0.77460

**Y-int:** -1.7092 +/- 0.19536

**m:** 2.20659 +/- 0.23811

**Dm:** 5.95110

**r:** 0.97749

---

Data for Drug Combo: 6 (6+6 [1:7])

**Dose A Effect**

|      |        |
|------|--------|
| 0.6+ | 0.439  |
| 0.8+ | 0.526  |
| 1.0+ | 0.717  |
| 1.2+ | 0.8599 |

1.6+ 0.9497

2.0+ 0.9773

6 data points entered.

**X-int:** 0.75678

**Y-int:** -2.6741 +/- 0.27323

**m:** 3.53355 +/- 0.28358

**Dm:** 5.71183

**r:** 0.98736

### Dose-Effect Curve

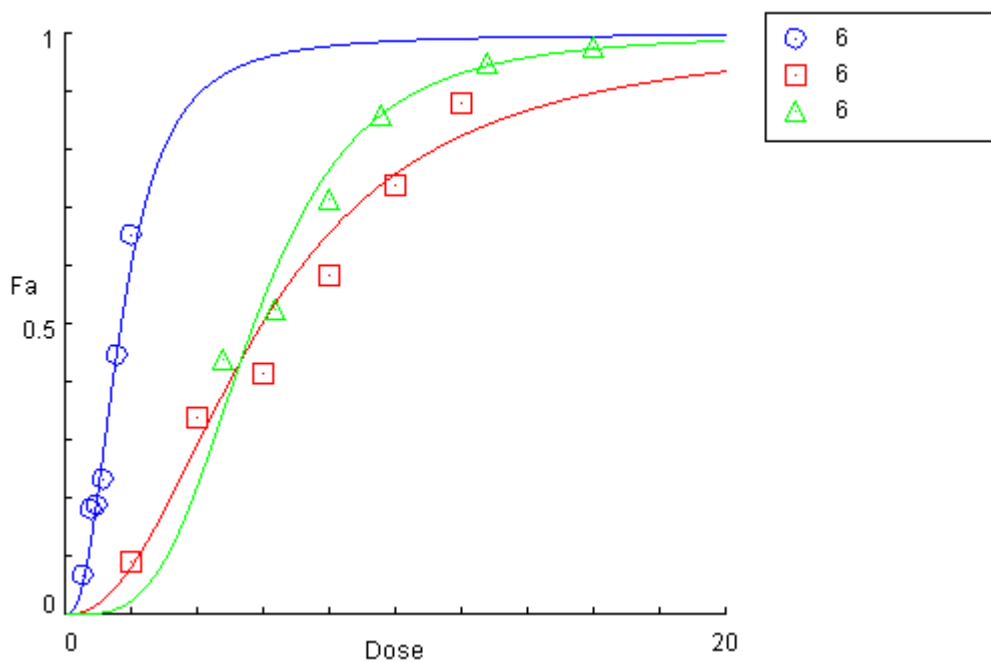

### Median-Effect Plot

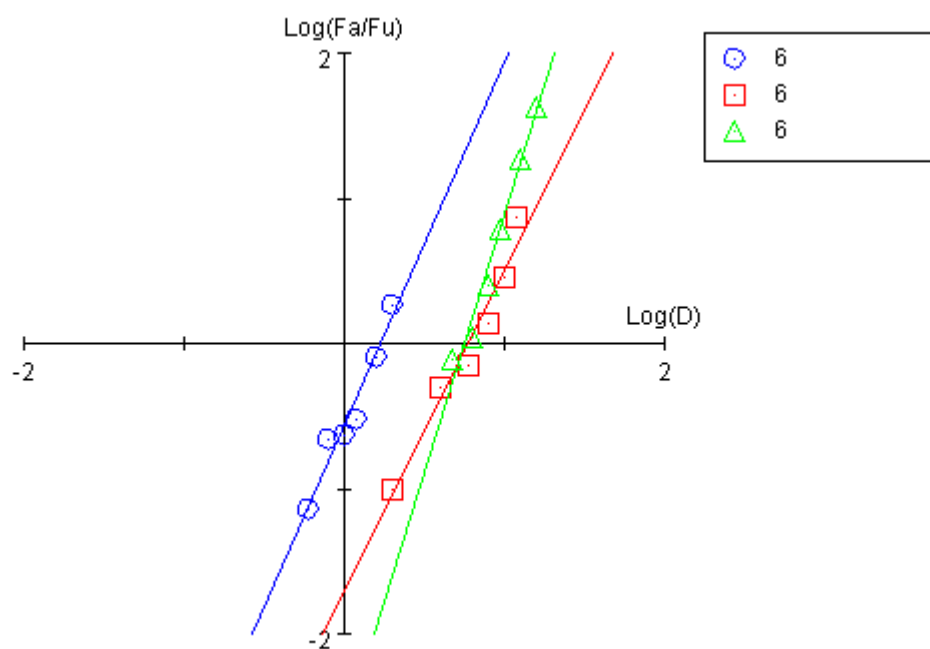

CI Data for Drug Combo: 6 (6+6 [1:7])

**Fa CI Value Total Dose**

|      |         |         |
|------|---------|---------|
| 0.05 | 1.98383 | 2.48248 |
| 0.1  | 1.76731 | 3.06707 |
| 0.15 | 1.64553 | 3.49609 |
| 0.2  | 1.55953 | 3.85826 |
| 0.25 | 1.49198 | 4.18552 |
| 0.3  | 1.43542 | 4.49404 |
| 0.35 | 1.38595 | 4.79393 |
| 0.4  | 1.34124 | 5.09262 |
| 0.45 | 1.29976 | 5.39649 |
| 0.5  | 1.26039 | 5.71183 |
| 0.55 | 1.22224 | 6.04559 |
| 0.6  | 1.18453 | 6.40633 |
| 0.65 | 1.14646 | 6.80548 |
| 0.7  | 1.10716 | 7.25961 |
| 0.75 | 1.06549 | 7.79474 |
| 0.8  | 1.01976 | 8.45589 |
| 0.85 | 0.96707 | 9.33186 |
| 0.9  | 0.90137 | 10.6372 |
| 0.95 | 0.80476 | 13.1421 |
| 0.97 | 0.74255 | 15.2760 |

CI values for actual experimental points:

| Total Dose | Fa     | CI Value |
|------------|--------|----------|
| 4.8        | 0.439  | 1.17879  |
| 6.4        | 0.526  | 1.34956  |
| 8.0        | 0.717  | 1.17709  |
| 9.6        | 0.8599 | 0.96087  |
| 12.8       | 0.9497 | 0.78596  |
| 16.0       | 0.9773 | 0.68684  |

Combination Index Plot

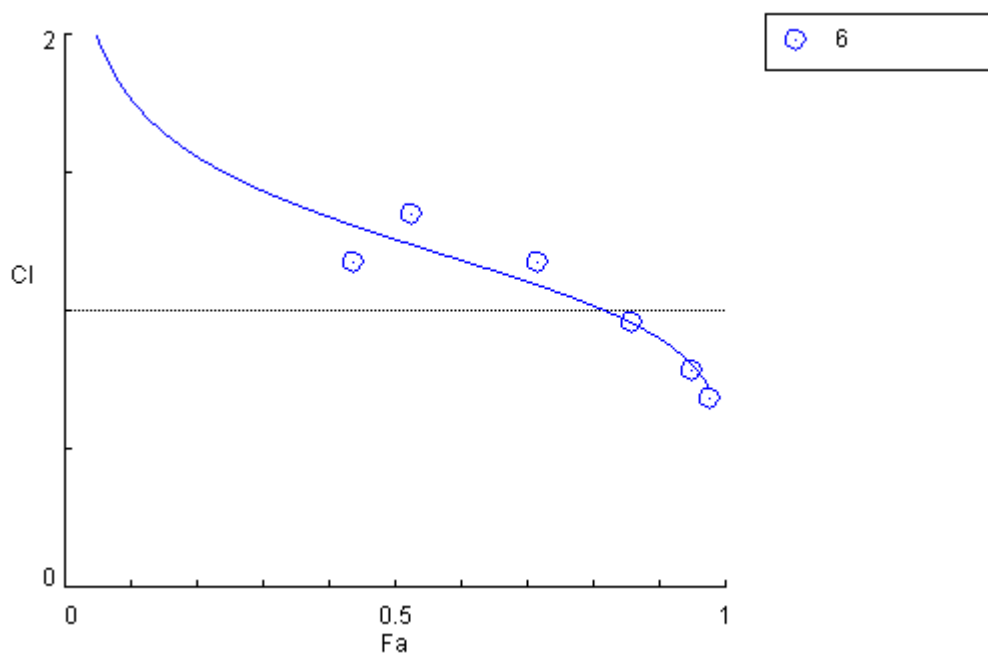

## Logarithmic Combination Index Plot

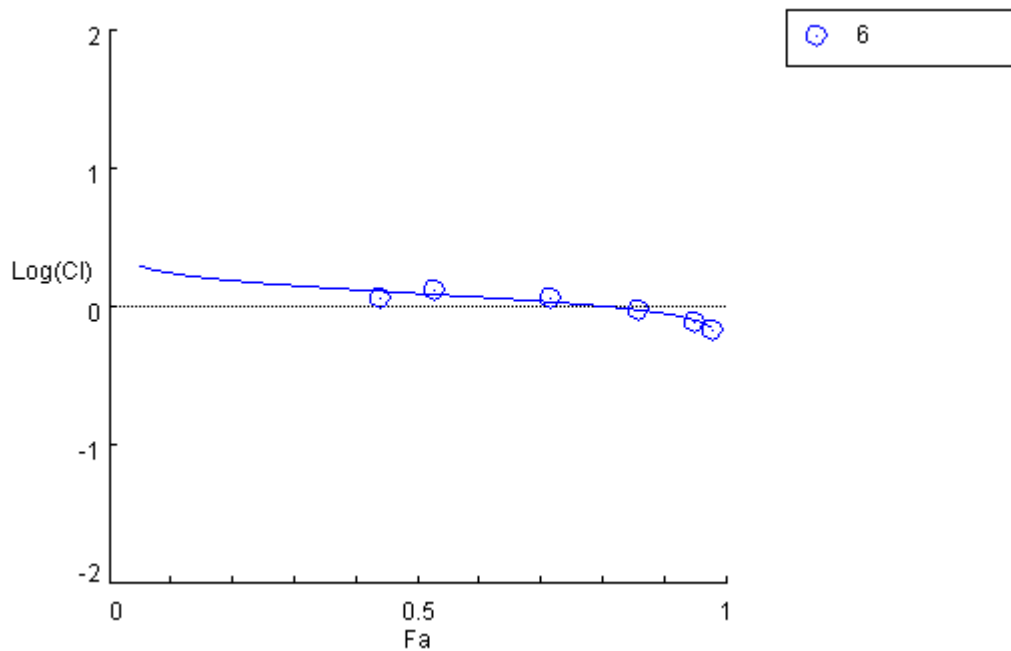

## DRI Data for Drug Combo: 6 (6+6 [1:7])

| Fa   | Dose 6  | Dose 6  | DRI 6   | DRI 6   |
|------|---------|---------|---------|---------|
| 0.05 | 0.51920 | 1.56704 | 1.67316 | 0.72142 |
| 0.1  | 0.70130 | 2.19860 | 1.82923 | 0.81925 |
| 0.15 | 0.84478 | 2.71142 | 1.93308 | 0.88635 |
| 0.2  | 0.97186 | 3.17505 | 2.01513 | 0.94048 |
| 0.25 | 1.09112 | 3.61719 | 2.08552 | 0.98767 |
| 0.3  | 1.20723 | 4.05354 | 2.14903 | 1.03083 |
| 0.35 | 1.32335 | 4.49531 | 2.20838 | 1.07167 |
| 0.4  | 1.44210 | 4.95216 | 2.26539 | 1.11134 |
| 0.45 | 1.56596 | 5.43377 | 2.32145 | 1.15075 |
| 0.5  | 1.69764 | 5.95110 | 2.37772 | 1.19073 |
| 0.55 | 1.84040 | 6.51767 | 2.43536 | 1.23210 |
| 0.6  | 1.99847 | 7.15154 | 2.49562 | 1.27580 |
| 0.65 | 2.17780 | 7.87834 | 2.56005 | 1.32302 |
| 0.7  | 2.38728 | 8.73695 | 2.63075 | 1.37543 |
| 0.75 | 2.64130 | 9.79090 | 2.71086 | 1.43553 |
| 0.8  | 2.96543 | 11.1543 | 2.80556 | 1.50757 |
| 0.85 | 3.41155 | 13.0616 | 2.92464 | 1.59963 |
| 0.9  | 4.10951 | 16.1083 | 3.09067 | 1.73066 |
| 0.95 | 5.55085 | 22.6002 | 3.37897 | 1.96535 |
| 0.97 | 6.87482 | 28.7576 | 3.60033 | 2.15147 |

## DRI values calculated at experimental points

| Fa     | Dose 6  | Dose 6  | DRI 6   | DRI 6   |
|--------|---------|---------|---------|---------|
| 0.439  | 1.53814 | 5.32517 | 2.56357 | 1.26790 |
| 0.526  | 1.77025 | 6.23856 | 2.21282 | 1.11403 |
| 0.717  | 2.46769 | 9.06909 | 2.46769 | 1.29558 |
| 0.8599 | 3.52295 | 13.5430 | 2.93579 | 1.61226 |
| 0.9497 | 5.53680 | 22.5358 | 3.46050 | 2.01213 |

0.9773 7.71427 32.7422 3.85714 2.33873

## DRI Plot for Combo: 6 (6+6 [1:7])

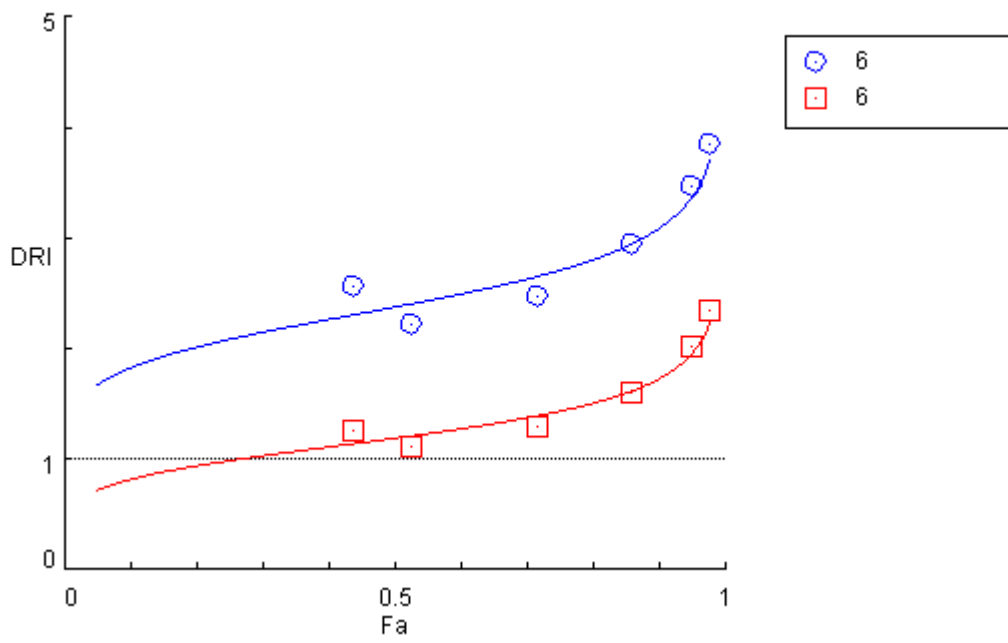

## Log(DRI) Plot for Combo: 6 (6+6 [1:7])

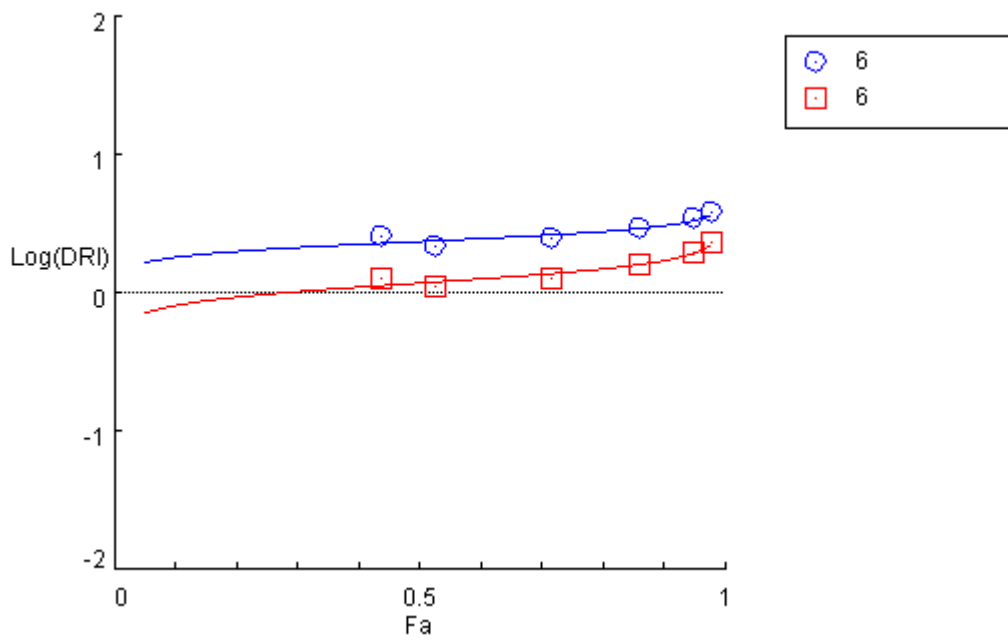

## Isobologram for Combo: 6 (6+6 [1:7])

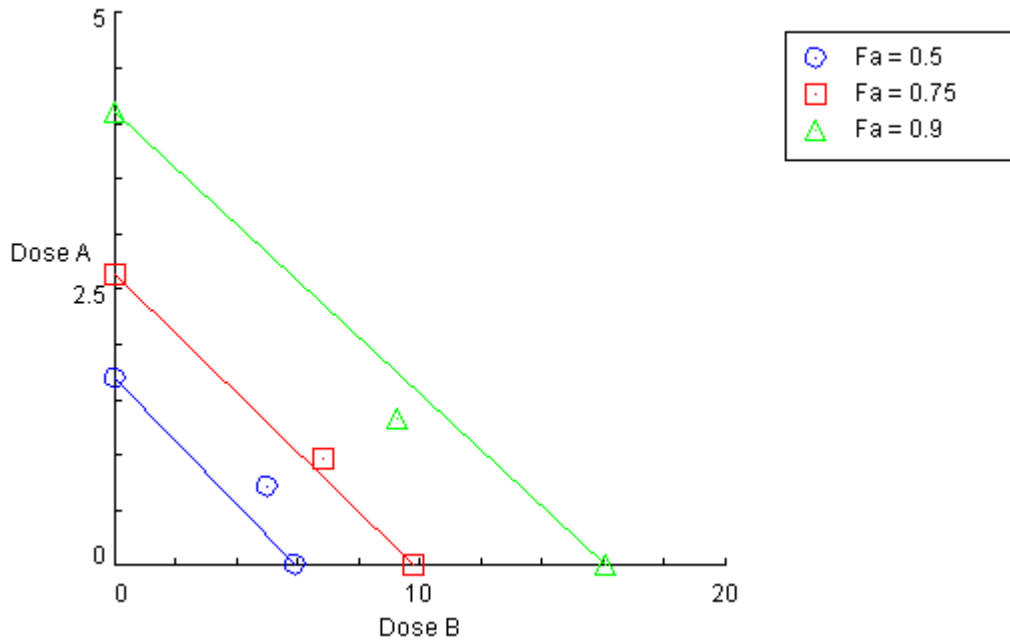

Polygonogram at Fa = 0.9

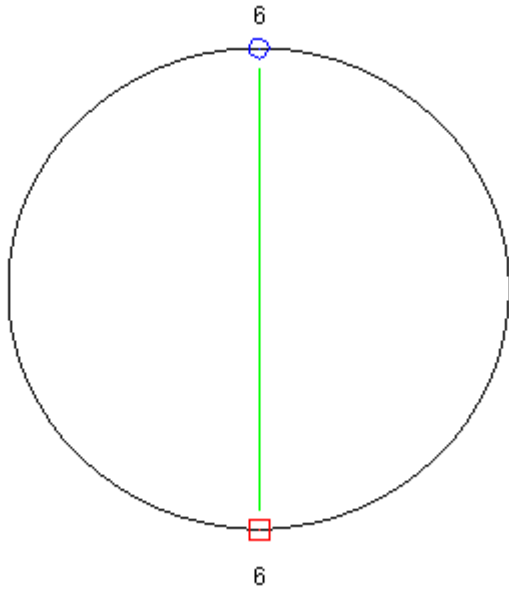

## Summary Table

**Experiment Name:** SK5-LIANHE  
**Date:** 2017/9/13  
**File Name:** C:\Users\>>\Desktop\SK-5.cse  
**Description:** COMBINATION

**Drug:** vemurafenib (6) [uM/L]  
**Drug:** GSK126 (6) [uM/L]  
**Drug Combo:** combination (6) (6+6 [1:7])

| Drug/Combo | Dm      | m       | r       |
|------------|---------|---------|---------|
| 6          | 1.69764 | 2.48537 | 0.97514 |
| 6          | 5.95110 | 2.20659 | 0.97749 |
| 6          | 5.71183 | 3.53355 | 0.98736 |

CI values at:

---

| <b>Combo</b> | <b>ED50</b> | <b>ED75</b> | <b>ED90</b> | <b>ED95</b> |
|--------------|-------------|-------------|-------------|-------------|
| 6            | 1.26039     | 1.06549     | 0.90137     | 0.80476     |

---

Data for Fa = 0.5

| <b>Drug/Combo</b> | <b>CI value</b> | <b>Dose 6</b> | <b>Dose 6</b> |
|-------------------|-----------------|---------------|---------------|
| 6                 |                 | 1.69764       |               |
| 6                 |                 |               | 5.95110       |
| 6                 | 1.26039         | 0.71398       | 4.99785       |

---

Data for Fa = 0.75

| <b>Drug/Combo</b> | <b>CI value</b> | <b>Dose 6</b> | <b>Dose 6</b> |
|-------------------|-----------------|---------------|---------------|
| 6                 |                 | 2.64130       |               |
| 6                 |                 |               | 9.79090       |
| 6                 | 1.06549         | 0.97434       | 6.82039       |

---

Data for Fa = 0.9

| <b>Drug/Combo</b> | <b>CI value</b> | <b>Dose 6</b> | <b>Dose 6</b> |
|-------------------|-----------------|---------------|---------------|
| 6                 |                 | 4.10951       |               |
| 6                 |                 |               | 16.1083       |
| 6                 | 0.90137         | 1.32965       | 9.30755       |

---

Data for Fa = 0.95

| <b>Drug/Combo</b> | <b>CI value</b> | <b>Dose 6</b> | <b>Dose 6</b> |
|-------------------|-----------------|---------------|---------------|
| 6                 |                 | 5.55085       |               |
| 6                 |                 |               | 22.6002       |
| 6                 | 0.80476         | 1.64276       | 11.4993       |

---

Data for Fa = 0.97

| <b>Drug/Combo</b> | <b>CI value</b> | <b>Dose 6</b> | <b>Dose 6</b> |
|-------------------|-----------------|---------------|---------------|
| 6                 |                 | 6.87482       |               |
| 6                 |                 |               | 28.7576       |
| 6                 | 0.74255         | 1.90950       | 13.3665       |
